# Supplementary material
Source: Springer Nature journal article supplement (https://www.springermedizin.de/resource/supplementary/12889_2011_3691_MOESM1_ESM.pdf/9489836)

Survival curves for TB cases (7012 New, 1228 Retreatment cases)

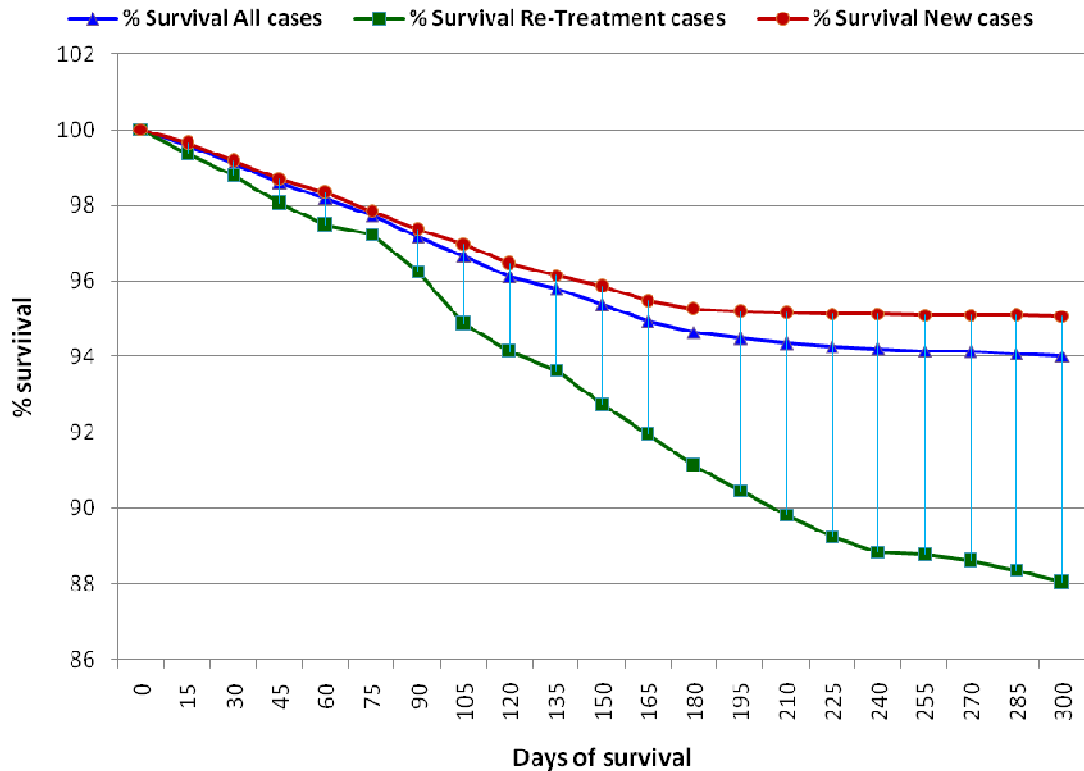

Supplement: MOESM1 [file 9489836]
